# Supplementary material
Source: HighWire-hosted journal article supplement (https://www.genetics.org/content/suppl/2012/09/07/genetics.112.144071)
Supplement: FigureS9.pdf [file FigureS9.pdf]

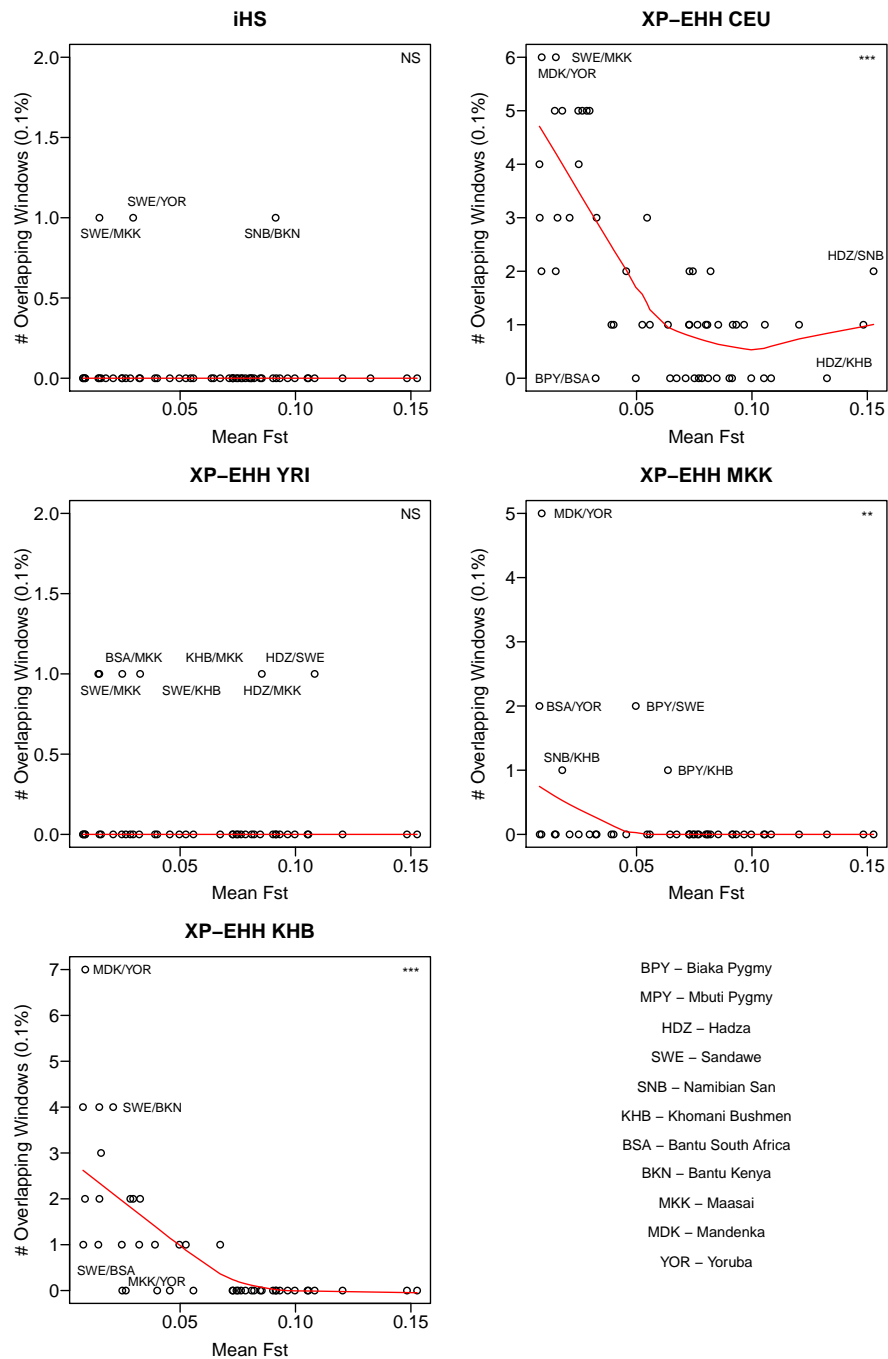

**Figure S9. Number of shared 100 kb genomic windows in the top empirical 0.1% vs. mean  $F_{ST}$  for pairs of populations.** Each point is a different population pair (some points are labeled, see key). Titles indicate the haplotype statistics for which the shared windows occur. Line is a best-fit *lowess* curve through the points. Significance of the p-value for the Mantel correlation between the  $x$  and  $y$  variables is indicated in the upper right corner: "NS": not significant, "\*\*":  $< 0.05$ , "\*\*\*":  $< 0.01$ , "\*\*\*\*":  $< 0.001$ .
