# Supplementary material
Source: HighWire-hosted journal article supplement (https://www.genetics.org/content/suppl/2012/09/07/genetics.112.144071)
Supplement: TableS3.pdf [file TableS3.pdf]

**Table S3. Mantel correlations between matrices of the indicated variables for each haplotype statistic.**

| Haplotype Statistic | $F_{ST}$ and              |                          | Correlation of Window Statistics and |                          | Average Bantu Ancestry and       |                           |
|---------------------|---------------------------|--------------------------|--------------------------------------|--------------------------|----------------------------------|---------------------------|
|                     | Overlap Top 1%            | Overlap Top 0.1%         | Overlap Top 1%                       | Overlap Top 0.1%         | Correlation of Window Statistics | Overlap Top 1%            |
| iHS                 | -0.626<br><b>(0.0002)</b> | -0.116<br><b>(0.212)</b> | 0.833<br><b>(0.002)</b>              | 0.223<br><b>(0.057)</b>  | 0.300<br><b>(0.175)</b>          | 0.468<br><b>(0.029)</b>   |
| XP-EHH CEU          | -0.885<br><b>(0)</b>      | -0.664<br><b>(0)</b>     | 0.894<br><b>(0.0002)</b>             | 0.637<br><b>(0.0004)</b> | 0.400<br><b>(0.123)</b>          | 0.490<br><b>(0.043)</b>   |
| XP-EHH YRI          | -0.200<br><b>(0.137)</b>  | -0.096<br><b>(0.346)</b> | 0.834<br><b>(0.0002)</b>             | 0.310<br><b>(0.066)</b>  | -0.643<br><b>(0.008)</b>         | -0.531<br><b>(0.0004)</b> |
| XP-EHH MKK          | -0.500<br><b>(0)</b>      | -0.341<br><b>(0.001)</b> | 0.866<br><b>(0.0002)</b>             | 0.514<br><b>(0.007)</b>  | 0.455<br><b>(0.043)</b>          | 0.443<br><b>(0.023)</b>   |
| XP-EHH KHB          | -0.500<br><b>(0)</b>      | -0.647<br><b>(0)</b>     | 0.869<br><b>(0.0002)</b>             | 0.655<br><b>(0.0002)</b> | 0.495<br><b>(0.063)</b>          | 0.527<br><b>(0.021)</b>   |

The indicated variables are calculated between all pairs of populations (creating matrices for which Mantel correlations can be calculated). P-values for the Mantel correlations, assessed by 5,000 randomizations, are indicated in parentheses and in bold if significant (p-value < 0.05).  $F_{ST}$ : mean  $F_{ST}$  over all SNPs between pairs of populations; Correlations of Window Statistics: correlations of window statistics across all genomic windows between pairs of populations; Overlap Top 1%: number of shared windows in the empirical top 1% between pairs of populations; Overlap Top 0.1%: number of shared windows in the empirical top 0.1% between pairs of populations.
